# Supplementary material
Source: Royal Society of Chemistry journal article supplement (doi:10.1039/d6ta00673f)
Supplement: d6ta00673f1.pdf [file d6ta00673f1.pdf]

## SUPPORTING INFORMATION

### **Entropy-Driven Mechanisms in P2-Type Layered Oxide Cathodes for Sodium-Ion Batteries: New Insights from First-Principles and Electrochemical Analysis**

*Arianna Massaro,<sup>a,b,\*</sup> Silvia Porporato,<sup>b,c</sup> Miriam Botros,<sup>d,\*</sup> Alessandro Piovano,<sup>b,c,\*</sup> Hamideh Darjazi,<sup>b,c</sup> David Stenzel,<sup>d</sup> Giuseppina Meligrana,<sup>b,c</sup> Ana B. Muñoz-García,<sup>b,e</sup> Ben Breitung,<sup>d</sup> Michele Pavone,<sup>a,b</sup> and Claudio Gerbaldi<sup>b,c</sup>*

<sup>a</sup> Department of Chemical Sciences, University of Naples Federico II, Via Cintia 21, Napoli 80126, Italy

<sup>b</sup> National Reference Centre for Electrochemical Energy Storage (GISEL), INSTM, Via Giusti 9, Firenze 50121, Italy

<sup>c</sup> GAME Lab, Department of Applied Science and Technology (DISAT), Politecnico di Torino, Corso Duca degli Abruzzi 24, Torino 10129, Italy

<sup>d</sup> Department of Physics “E.Pancini”, University of Naples Federico II, Via Cintia 21, Napoli 80126, Italy

<sup>e</sup> Institute of Nanotechnology, Karlsruhe Institute of Technology (KIT), Hermann-von-Helmholtz Platz 1, 76344 Eggenstein- Leopoldshafen, Germany

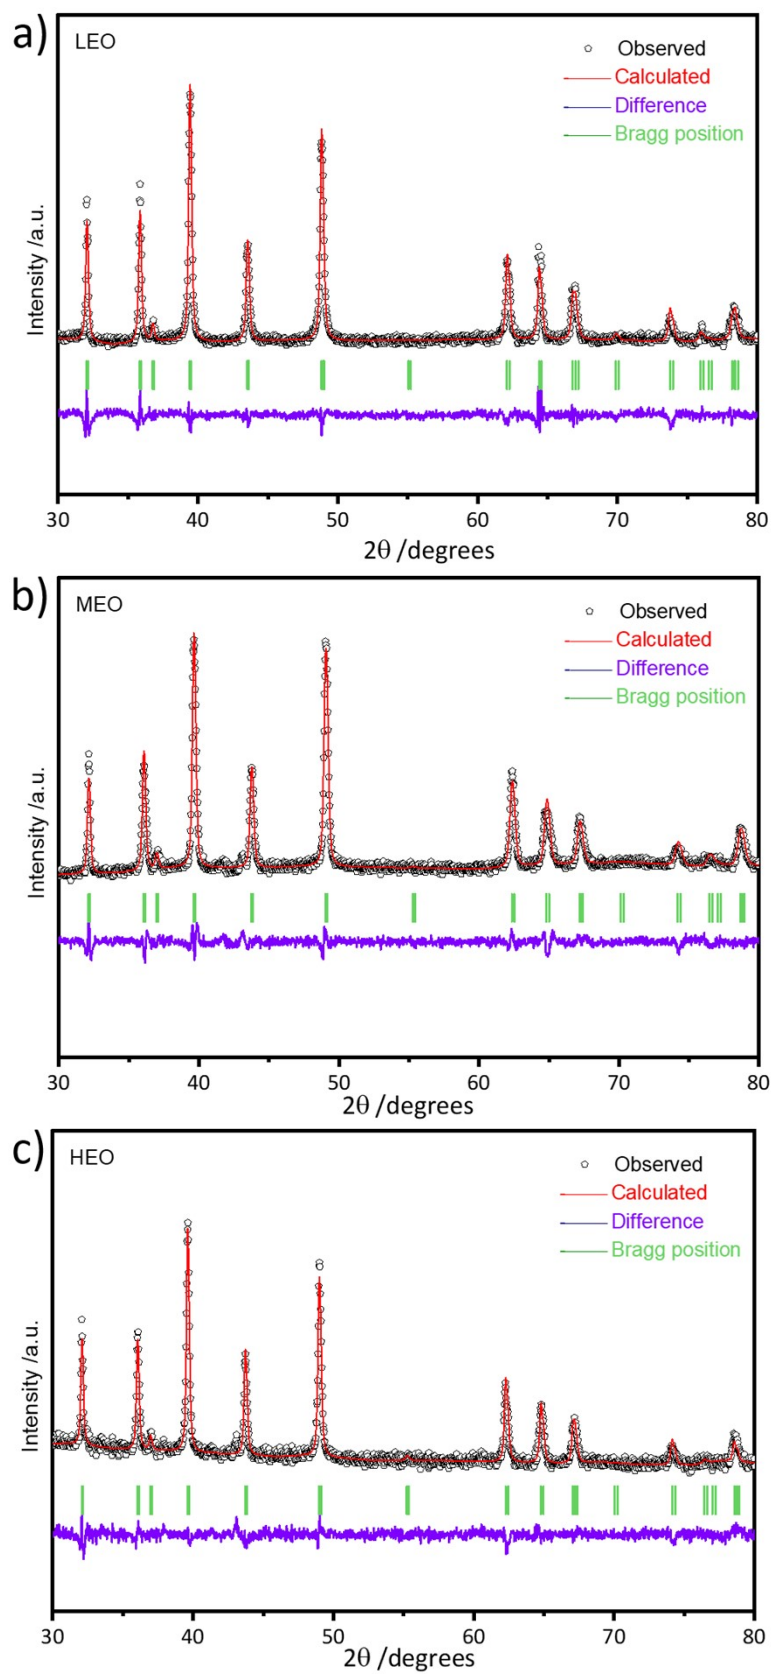

**Figure S1.** XRD patterns and Rietveld refinement results for (a) LEO (unweighted profile factor  $R_p=2.6\%$ ), (b) MEO ( $R_p=2.1\%$ ), and (c) HEO ( $R_p=1.6\%$ ).

**Table S1.** Results of Rietveld refinement for the three samples, including lattice parameters ( $a$ ,  $b$ ,  $c$ ), cell volume  $V$ , angles ( $\alpha$ ,  $\beta$ ,  $\gamma$ ), and unweighted profile factor  $R_p$ .

|            | <b>a,b (Å)</b> | <b>c (Å)</b> | <b>V (Å<sup>3</sup>)</b> | <b><math>\alpha</math>, <math>\beta</math></b> | <b><math>\gamma</math></b> | <b><math>R_p</math> (%)</b> |
|------------|----------------|--------------|--------------------------|------------------------------------------------|----------------------------|-----------------------------|
| <b>LEO</b> | 2.8912         | 11.1641      | 80.8198                  | 90°                                            | 120°                       | 2.6                         |
| <b>MEO</b> | 2.8742         | 11.1385      | 79.6871                  | 90°                                            | 120°                       | 2.1                         |
| <b>HEO</b> | 2.8757         | 11.1532      | 79.8741                  | 90°                                            | 120°                       | 1.6                         |

**Table S2.** Lattice parameters of the minimum-energy structures for the  $P2\text{-Na}_x\text{MO}_2$  series in their  $8\times 4\times 1$  supercells as obtained at the PBE+U-D3BJ level of theory.

|                                   | <b>LEO</b>     |              | <b>MEO</b>     |              | <b>HEO</b>     |              |
|-----------------------------------|----------------|--------------|----------------|--------------|----------------|--------------|
| <b><math>x_{\text{Na}}</math></b> | <b>a,b (Å)</b> | <b>c (Å)</b> | <b>a,b (Å)</b> | <b>c (Å)</b> | <b>a,b (Å)</b> | <b>c (Å)</b> |
| 0.68                              | 23.272         | 11.233       | 23.097         | 11.155       | 23.127         | 11.169       |
| 0.50                              | 23.165         | 11.181       | 23.007         | 11.112       | 22.808         | 11.487       |
| 0.30                              | 23.097         | 11.149       | 23.031         | 11.123       | 22.773         | 11.469       |
| 0.12                              | 22.951         | 11.078       | 22.927         | 11.073       | 22.794         | 11.480       |

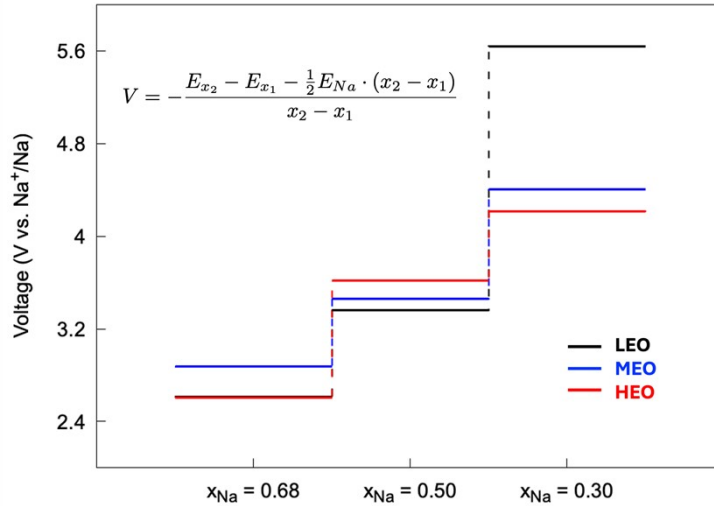

**Figure S2.** Capacity-voltage profile of  $P2-Na_xMO_2$  compounds computed at PBE+U-D3BJ level of theory according to the displayed equation. Color legend is shown in the graph.

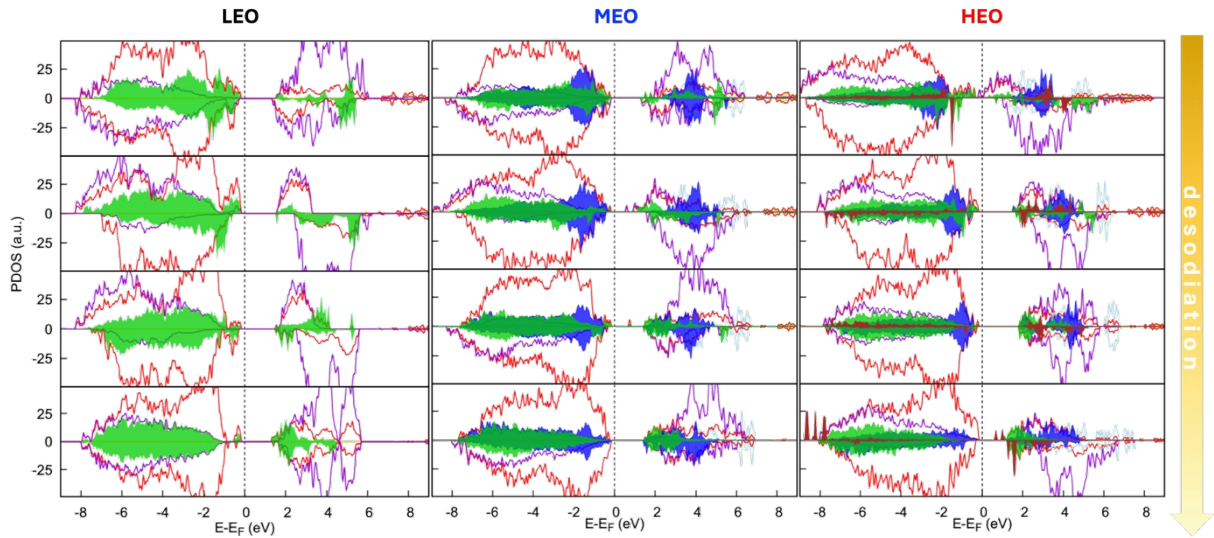

**Figure S3.** Atom- and angular momentum-projected density of states (PDOS) of LEO, MEO, and HEO as function of sodiation degree computed at HSE06 level of theory. Color code: Na  $s$  states, yellow; Mn  $d$  states, violet; Ni  $d$  states, green; Co  $d$  states, blue; Ti  $d$  states, cyan; Mg  $s$  states, orange; Al  $p$  states, grey; Fe  $d$  states, burgundy; O  $p$  states, red.

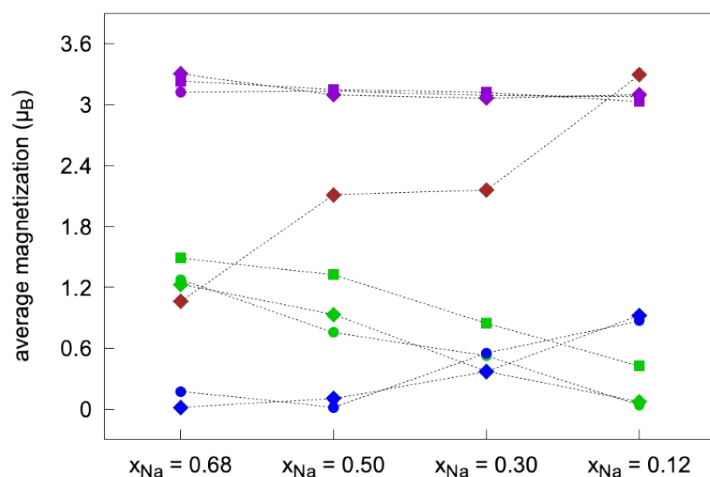

**Figure S4.** Average magnetization on Mn, Ni, Co and Fe sublattices in LEO, MEO and HEO as function of sodiation degree computed at HSE06 level of theory. Legend: Mn purple, Ni green, Co blue, Fe brown; LEO squares, MEO circles, HEO diamonds.

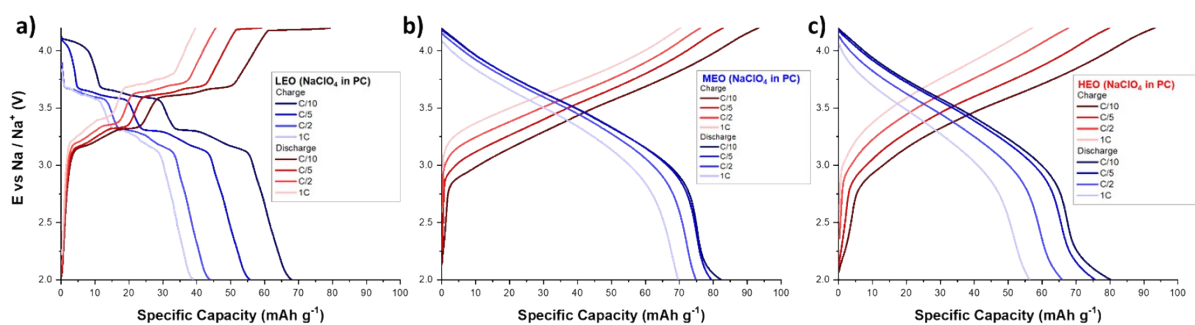

**Figure S5.** Representative voltage vs. specific capacity profiles recorded at different C-rates upon galvanostatic charge/discharge cycling of Na metal cells based on **a)** LEO, **b)** MEO, and **c)** HEO with standard electrolyte ( $\text{NaClO}_4$  1M in PC), within the voltage range of 2.0–4.2 V vs  $\text{Na}^+/\text{Na}$ .

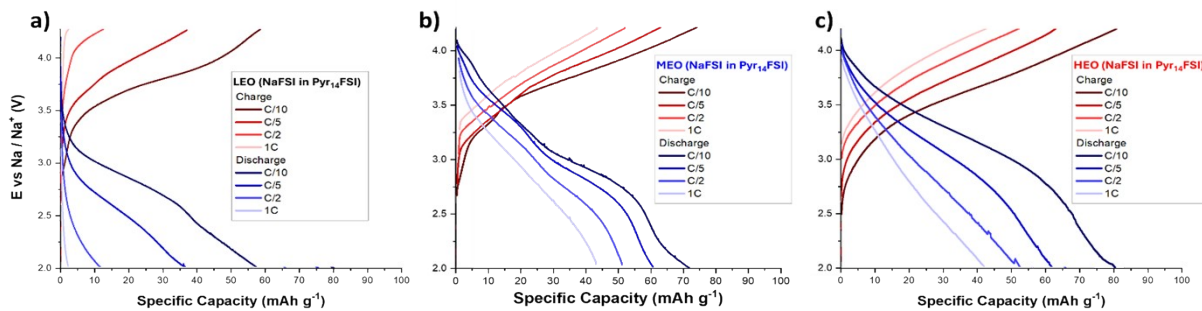

**Figure S6.** Representative voltage vs. specific capacity profiles recorded at different C-rates upon galvanostatic charge/discharge cycling of Na metal cells based on **a)** LEO, **b)** MEO, and **c)** HEO with standard electrolyte (NaFSI in Pyr<sub>14</sub>FSI 1:4), within the voltage range of 2.0–4.2 V vs Na<sup>+</sup>/Na.

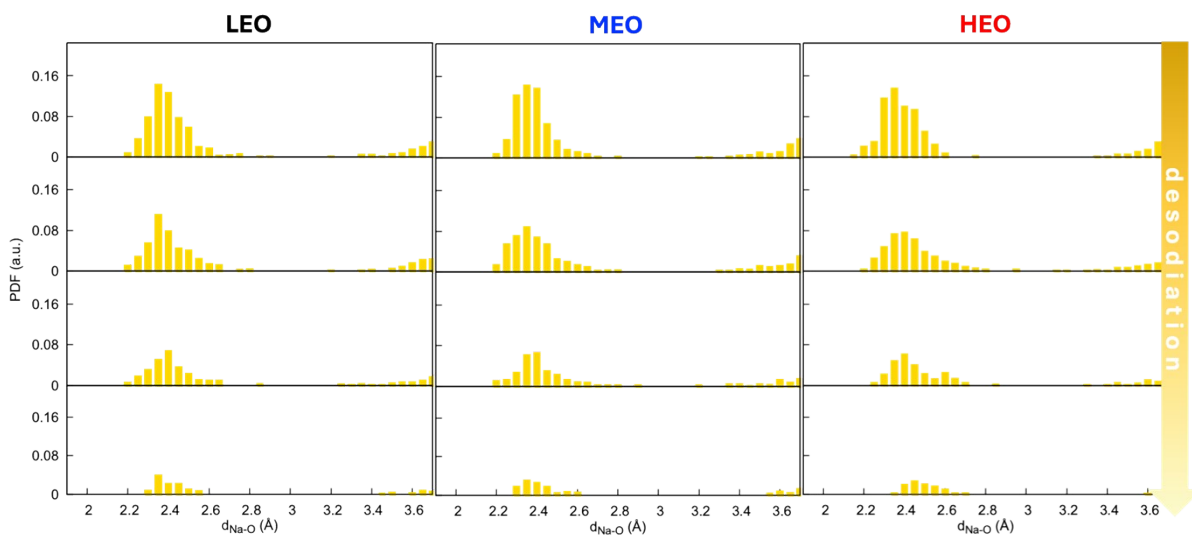

**Figure S7.** Pair distribution function of Na-O distances computed for the PBE+U-D3BJ minimum-energy structures of LEO, MEO and HEO at different sodiation stages.

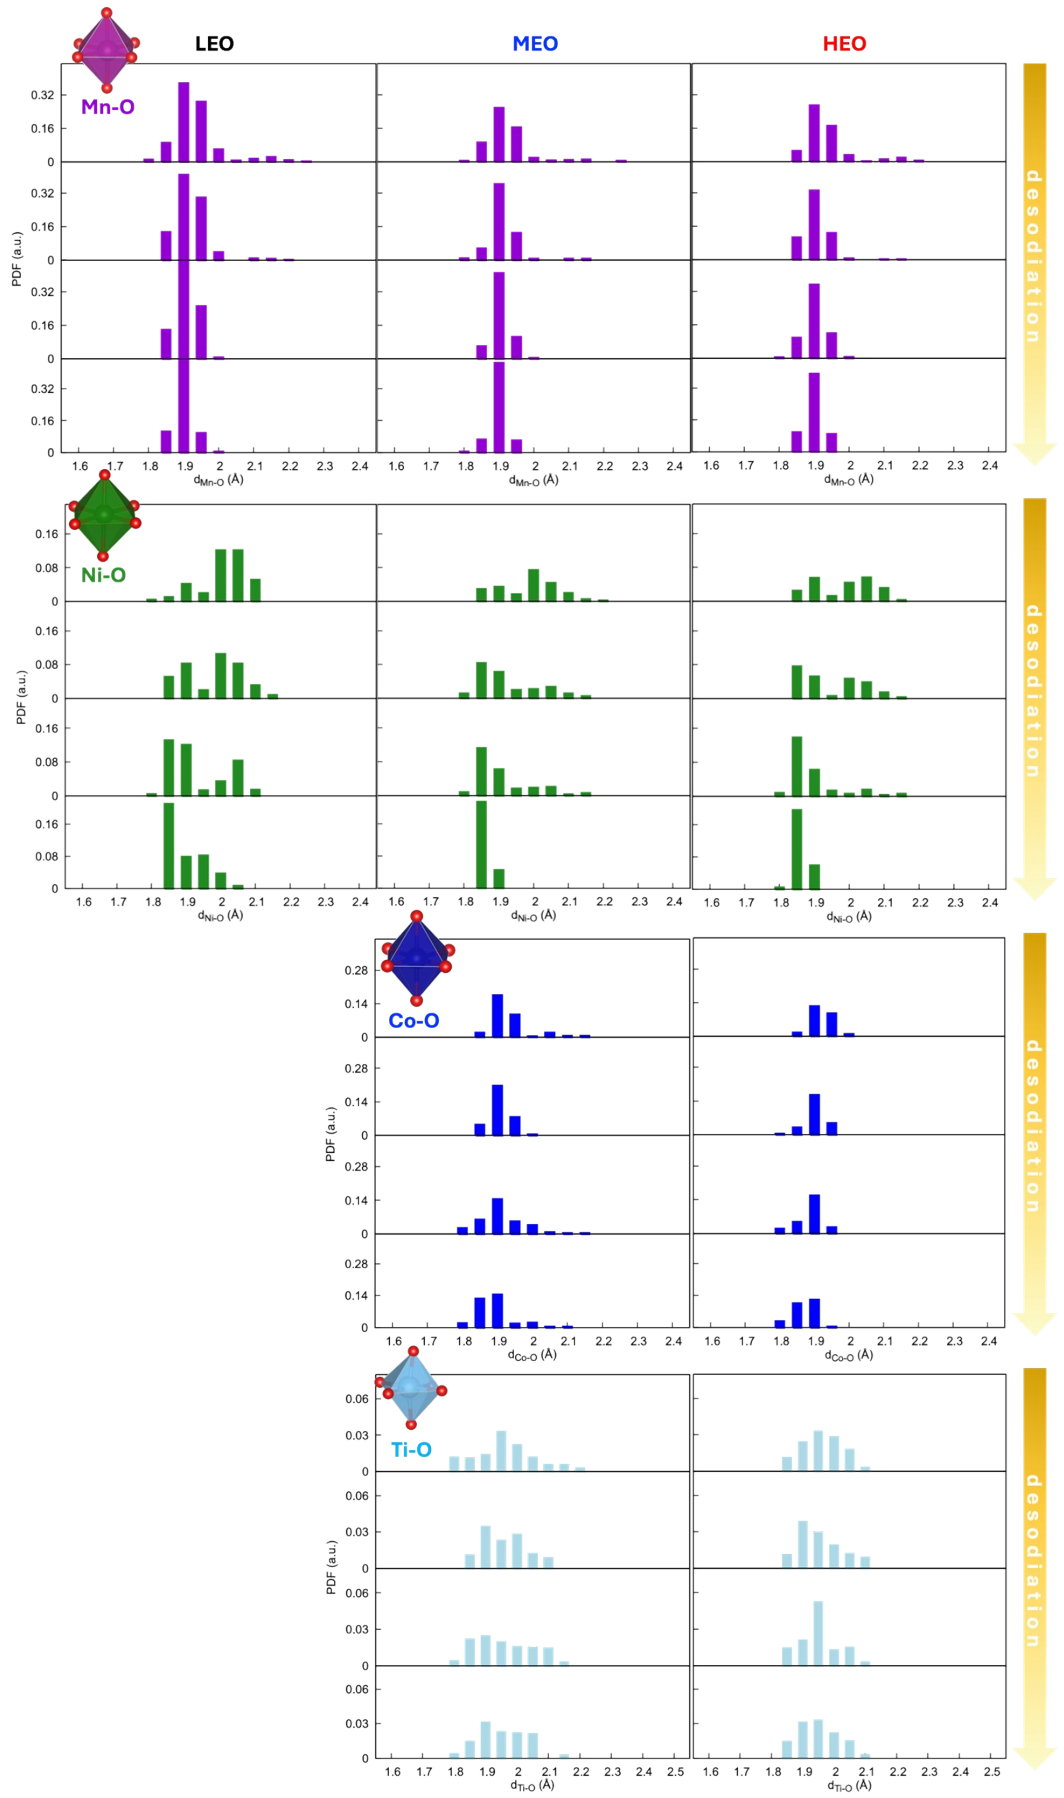

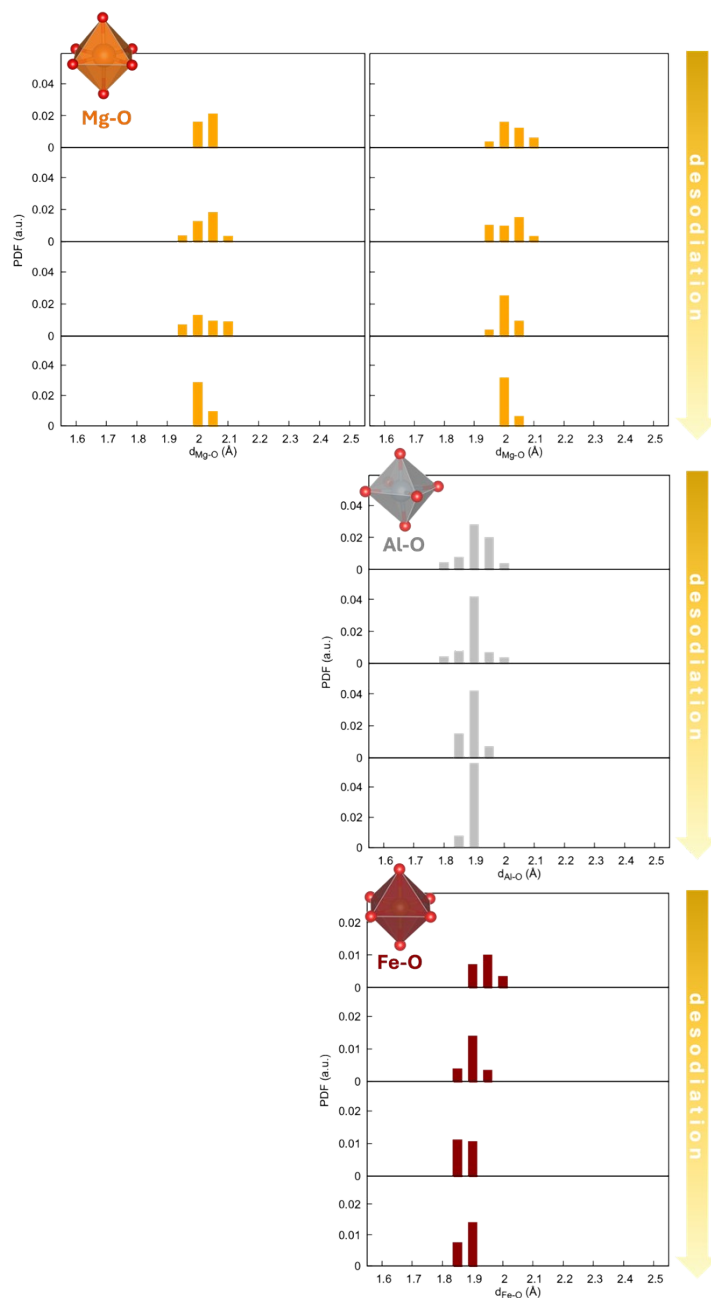

**Figure S8.** Pair distribution function of M-O distances computed for the PBE+U-D3BJ minimum-energy structures of LEO, MEO and HEO at different sodiation stages.
